# Supplementary material for: Novel Aflatoxin-Degrading Enzyme from Bacillus shackletonii L7
Source: MDPI journal article supplement (doi:10.3390/toxins9010036), 2017-01-14
Supplement: s1 [file s1]

# Supplementary Material: Novel Aflatoxin-Degrading Enzyme from *Bacillus shackletonii* L7

Liang Xu, Mohamed Farah Eisa Ahmed, Lancine Sangare, Yueju Zhao, Jonathan Nimal Selvaraj, Fuguo Xing, Yan Wang, Hongping Yang and Yang Liu

**Table S1.** AFB<sub>1</sub> degradation by individual microbial isolates selected using coumarin medium.

| No | Isolates <sup>a</sup>                      | Source of Samples              | Percentage of Degradation (%) <sup>b</sup> |
|----|--------------------------------------------|--------------------------------|--------------------------------------------|
| 1  | <i>Stenotrophomonas maltophilia</i> 97-D-5 | Soil from Dongping, Taian      | 88.5                                       |
| 2  | <i>Stenotrophomonas</i> sp. E-D-1          | Soil from Dongping, Taian      | 86.4                                       |
| 3  | <i>Stenotrophomonas maltophilia</i> 97-D-3 | Soil from Dongping, Taian      | 85.0                                       |
| 4  | <i>Pseudomonas aeruginosa</i> N17-1        | Soil from Changping, Beijing   | 82.8                                       |
| 5  | <i>Stenotrophomonas</i> sp. 97-D-1         | Soil from Dongping, Taian      | 80.2                                       |
| 6  | <i>Arthrobacter</i> sp. L15                | Soil from Qiandou, Jilin       | 78.3                                       |
| 7  | <i>Flavobacteriaceae</i> sp. 14            | Soil from Quyang, Shanxi       | 74.1                                       |
| 8  | <i>Pseudomonas aeruginosa</i> F26-1        | Soil from Changping, Beijing   | 73.3                                       |
| 9  | <i>Bacillus shackletonii</i> L7            | Soil from Tangshan, Hebei      | 71.7                                       |
| 10 | F26-2                                      | Soil from Changping, Beijing   | 69.0                                       |
| 11 | NS7                                        | Maize from Yancheng, Jiangsu   | 65.4                                       |
| 12 | NS3                                        | Rice from Chaoyang, Beijing    | 65.4                                       |
| 13 | 19-A                                       | Soil from Guangzhou, Guangdong | 65.2                                       |
| 14 | F18-1                                      | Soil from Chaoyang, Beijing    | 56.1                                       |
| 15 | NS10                                       | Maize from Zhuozhou, Hebei     | 56.0                                       |
| 16 | NS6                                        | Maize from Changzhi, Shanxi    | 52.6                                       |
| 17 | F24-C                                      | Soil from Changping, Beijing   | 52.5                                       |
| 18 | F24-1                                      | Soil from Changping, Beijing   | 52.4                                       |
| 19 | NS8                                        | Maize from Baoji, Shanxi       | 45.5                                       |
| 20 | NS9                                        | Maize from Yancheng, Jiangsu   | 41.4                                       |
| 21 | 30                                         | Soil from Shaoguan, Guangdong  | 39.3                                       |
| 22 | F25                                        | Soil from Changping, Beijing   | 38.4                                       |
| 23 | NS1                                        | Rice from Changping, Beijing   | 33.4                                       |
| 24 | 18                                         | Soil from Fuyang, Anhui        | 30.3                                       |
| 25 | NSL 25                                     | Rice from Huaian, Jiangsu      | 30.0                                       |
| 26 | 16                                         | Soil from Shantou, Guangdong   | 24.8                                       |
| 27 | 29-D-1                                     | Soil from Quyang, Shanxi       | 22.7                                       |
| 28 | 20                                         | Soil from Shaoguan, Guangdong  | 21.9                                       |
| 29 | NSL24                                      | Rice from Huaian, Jiangsu      | 21.8                                       |
| 30 | M77                                        | Maize from Suzhou, Anhui       | 21.4                                       |
| 31 | M30                                        | Maize from Suzhou, Anhui       | 19.5                                       |
| 32 | NS2                                        | Rice from Changping, Beijing   | 16.4                                       |
| 33 | 25-C                                       | Soil from Shaoguan, Guangdong  | 16.0                                       |
| 34 | 25-B                                       | Soil from Shaoguan, Guangdong  | 15.0                                       |
| 35 | G-B                                        | Soil from Shantou, Guangdong   | 15.8                                       |
| 36 | NSL23                                      | Rice from Yangzhou, Jiangsu    | 15.2                                       |
| 37 | M15                                        | Maize from Suzhou, Anhui       | 13.8                                       |
| 38 | 25-C-3                                     | Soil from Fuyu, Jilin          | 13.1                                       |
| 39 | 25-C-2                                     | Soil from Fuyu, Jilin          | 12.9                                       |
| 40 | E-D                                        | Soil from Guangzhou, Guangdong | 12.7                                       |
| 41 | 11-B                                       | Soil from Dianbai, Guangdong   | 11.6                                       |
| 42 | F4-1                                       | Soil from Changping, Beijing   | 11.0                                       |
| 43 | M60                                        | Maize from Yancheng, Jiangsu   | 10.8                                       |

<sup>a</sup> Individual microbial isolates grown on medium with coumarin as the sole carbon source; <sup>b</sup> The detoxification tests were conducted in the dark at 37 °C for 72 h. The percentage of AFB<sub>1</sub> degradation was calculated using the following formula:  $(1 - \text{AFB}_1 \text{ peak area in treatment} / \text{AFB}_1 \text{ peak area in control}) \times 100\%$ .

**Table S2.** Characteristics of strain L7.

| Item Result <sup>a</sup>                      |            | Item Result                    |   | Item Result           |   | Item Result          |   |
|-----------------------------------------------|------------|--------------------------------|---|-----------------------|---|----------------------|---|
| Morphological Characteristic:                 |            |                                |   |                       |   |                      |   |
| Cell shape                                    | rod-shaped | Gram stain                     | + |                       |   |                      |   |
| Physiological and Biochemical Characteristic: |            |                                |   |                       |   |                      |   |
| Oxidase activity                              | -          | Arginine double hydrolase      | - | Hydrolysis of gelatin | - | Hydrolysis of amylum | - |
| Catalase activity                             | +          | Hydrolysis of butyrin          | - | Nitrate reduction     | - | Bile Esculin Test    | + |
| Hydrolysis of casein                          | +          | Hydrolysis of Tween 80         | - | Production of Indole  | - | Urease               | - |
| Utilization of citrate                        | +          | Production of H <sub>2</sub> S | - | VP test               | - | 5% NaCl              | + |
| Anaerobic growth                              | -          | 50 °C                          | + | 55 °C                 | + | pH 9.0               | + |
| Acid from:                                    |            |                                |   |                       |   |                      |   |
| Glycerin                                      | -          | Erythritol                     | - | D-Arabinose           | - | L-Arabinose          | - |
| D-Ribose                                      | +          | D-Xylose                       | + | L-Xylose              | - | Adonitol             | - |
| β-Methy-D-Xyloside                            | -          | D-Galactose                    | + | D-Glucose             | + | D-Fructose           | + |
| D-Mannose                                     | +          | L-Sorbose                      | - | L-Rhamnose            | - | Dulcitol             | - |
| Inositol                                      | -          | Mannitol                       | + | α-Methyl-D-Glucoside  | - | N-Acetyl glucosamine | + |
| Sorbitol                                      | -          | α-Methyl-D-Mannopyranoside     | - | Amygdalin             | + | Arbutin              | + |
| Aesculin                                      | +          | Salicin                        | + | D-(+)-Cellobiose      | + | D-Maltose            | + |
| D-Lactose                                     | +          | D-(+)-Melibiose                | - | D-Sucrose             | + | D-Trehalose          | + |
| Inulin                                        | -          | D-Melezitose                   | - | D-Raffinose           | - | Amylum               | - |
| Glycogen                                      | -          | Xylitol                        | - | D-Lyxose              | - | D-Fucose             | - |
| L-Fucose                                      | -          | D-Arabitol                     | - | L-Arabitol            | - | Potassium gluconate  | - |
| 2-Keto-D-Gluconate                            | -          | 5-Keto-D-Gluconate             | - |                       |   |                      |   |

<sup>a</sup> “+” means positive response; “-” means negative response.
